# Supplementary material for: The Modulation of SCO2730/31 Copper Chaperone/Transporter Orthologue Expression Enhances Secondary Metabolism in Streptomycetes
Source: MDPI journal article supplement (doi:10.3390/ijms221810143), 2021-09-20
Supplement: s1 [file s1]

**Table S3.** Bacterial strains, plasmids and primers used in this study.

| Strain                                                | Description                                                                                                                                                                                                       | Reference       |
|-------------------------------------------------------|-------------------------------------------------------------------------------------------------------------------------------------------------------------------------------------------------------------------|-----------------|
| <i>S.coelicolor</i> M145                              | SCP1- SCP2 <sup>-</sup> , reference strain.                                                                                                                                                                       | [1]             |
| <i>Streptomyces venezuelae</i><br>NRRL B-65442        | NRRL B-65442 strain                                                                                                                                                                                               |                 |
| <i>SCO2730::Tn5062</i><br>mutant                      | <i>S. coelicolor</i> interrupted at the <i>SCO2730</i> ORF                                                                                                                                                        | [2]             |
| <i>Streptomyces albus</i><br><i>J1074</i>             | <i>S.albus</i> G lacking <i>Sall</i> restriction modification system                                                                                                                                              | [3]             |
| <i>E. coli</i> TOP10                                  | F <sup>-</sup> <i>mcrA</i> Δ ( <i>mrr-hsdRMS-mcrBC</i> ) φ80 <i>lacZ</i> ΔM15 Δ <i>lacX74</i> <i>recA1</i> <i>araD139</i> Δ ( <i>ara-leu</i> )7697 <i>galU</i> <i>galK</i> <i>rpsL</i> <i>endA1</i> <i>nupG</i> . | Invitrogen      |
| <i>E. coli</i><br>ET12567/pUZ8002                     | <i>E. coli</i> ET12567 harbouring pUZ8002, a not self-transmissible plasmid which can mobilize <i>oriT</i> -containing plasmids by conjugation.                                                                   | [4]             |
| <b>Plasmids</b>                                       |                                                                                                                                                                                                                   |                 |
| pNG4                                                  | Integrative and conjugative vector, Hygro <sup>R</sup> .                                                                                                                                                          | [5]             |
| pNG4-SP44- <i>SCO2730/31</i><br><i>S. coelicolor</i>  | pNG4 harbouring the <i>S. coelicolor</i> <i>SCO2730/31</i> antisense mRNA under the SP44 promoter control                                                                                                         | This study      |
| pNG4-SP44- <i>SCO2730/31</i><br>consensus             | pNG4 harbouring the consensus <i>SCO2730/31</i> antisense mRNA under the SP44 promoter control                                                                                                                    | This study      |
| PCR™-Blunt II-TOPO®                                   | Zero Blunt® TOPO® PCR Cloning Kit, Kan <sup>R</sup> .                                                                                                                                                             | Invitrogen      |
| pKQLL-SP44- <i>SCO2730/31</i><br><i>S. coelicolor</i> | Kan <sup>R</sup> , pBR322 replication origin, M13F/R harbouring the <i>S. coelicolor</i> <i>SCO2730/31</i> antisense mRNA under the SP44 promoter control                                                         | BGI, this study |
| pKQLL-SP44-<br><i>SCO2730/31</i> consensus            | Kan <sup>R</sup> , pBR322 replication origin, M13F/R harbouring the consensus <i>SCO2730/31</i> antisense mRNA under the SP44 promoter control                                                                    | BGI, this study |
| <b>Primers</b>                                        |                                                                                                                                                                                                                   |                 |
| SCO4848F                                              | CGTCGTATCCCCTCGGTTG                                                                                                                                                                                               | [6]             |
| pMS82R                                                | GAGCCGGGAAAGCTCATTCA                                                                                                                                                                                              | [6]             |
| vnz22340                                              | TTACTTCTTGCTTGCTCGGAC                                                                                                                                                                                             | This study      |
| M13F                                                  | CAGGAAACAGCTATGA                                                                                                                                                                                                  | Invitrogen      |
| M13R                                                  | CTGGCCGTCGTTTTAC                                                                                                                                                                                                  | Invitrogen      |
| SP44F                                                 | TCTCACTCCGCTGAAACTGT                                                                                                                                                                                              | This study      |
| SP44R                                                 | ATGCTAGTCGCGTTGATCG                                                                                                                                                                                               | This study      |

## References

1. Kieser, T., *Practical streptomyces genetics*. John Innes Foundation: Norwich, 2000.
2. Gonzalez-Quinonez, N.; Corte-Rodriguez, M.; Alvarez-Fernandez-Garcia, R.; Rioseras, B.; Lopez-Garcia, M. T.; Fernandez-Garcia, G.; Montes-Bayon, M.; Manteca, A.; Yague, P., Cytosolic copper is a major modulator of germination, development and secondary metabolism in *Streptomyces coelicolor*. *Sci Rep* **2019**, 9, (1), 4214.
3. Chater, K. F.; Wilde, L. C., *Streptomyces albus* G mutants defective in the SalGI restriction-modification system. *J Gen Microbiol* **1980**, 116, (2), 323-34.
4. Flett, F.; Mersinias, V.; Smith, C. P., High efficiency intergeneric conjugal transfer of plasmid DNA from *Escherichia coli* to methyl DNA-restricting streptomycetes. *FEMS Microbiol Lett* **1997**, 155, (2), 223-9.
5. Gonzalez-Quinonez, N.; Lopez-Garcia, M. T.; Yague, P.; Rioseras, B.; Pisciotto, A.; Alduina, R.; Manteca, A., New PhiBT1 site-specific integrative vectors with neutral phenotype in *Streptomyces*. *Appl Microbiol Biotechnol* **2016**, 100, (6), 2797-808.
6. Rioseras, B.; Yague, P.; Lopez-Garcia, M. T.; Gonzalez-Quinonez, N.; Binda, E.; Marinelli, F.; Manteca, A., Characterization of SCO4439, a D-alanyl-D-alanine carboxypeptidase involved in spore cell wall maturation, resistance, and germination in *Streptomyces coelicolor*. *Sci Rep* **2016**, 6, 21659.
